# Supplementary material for: Sex differences in outcomes after mechanical thrombectomy for acute ischemic stroke in the ‘real world’: protocol for a systematic review and meta-analysis study
Source: HighWire-hosted journal article supplement (doi:10.1136/bmjopen-2021-056025), 2022-04-01
Supplement: bmjopen-2021-056025supp002_data_supplement.pdf [file bmjopen-2021-056025supp002_data_supplement.pdf]

● **Ovid MEDLINE(R) and Epub Ahead of Print, In-Process & Other Non-Indexed Citations, Daily and Versions(R) from 1946 to July 31, 2021**

| No. | Searches                                                                                                                                                                                                                                                                                                                                                                                                                                     |
|-----|----------------------------------------------------------------------------------------------------------------------------------------------------------------------------------------------------------------------------------------------------------------------------------------------------------------------------------------------------------------------------------------------------------------------------------------------|
| 1   | cerebrovascular disorders/ or basal ganglia cerebrovascular disease/ or exp brain ischemia/ or exp brain infarction/ or exp carotid artery diseases/ or carotid artery thrombosis/ or intracranial arterial diseases/ or cerebral arterial diseases/ or infarction, anterior cerebral artery/ or infarction, middle cerebral artery/ or infarction, posterior cerebral artery/ or exp "intracranial embolism and thrombosis"/ or exp stroke/ |
| 2   | (isch?emi\$ adj5 (stroke\$ or apoplex\$ or cerebral vasc\$ or cerebrovasc\$ or brain vasc\$ or cva or attack\$)).tw.                                                                                                                                                                                                                                                                                                                         |
| 3   | ((brain or cerebr\$ or cerebell\$ or vertebrobasil\$ or hemispher\$ or intracran\$ or intracerebral or infratentorial or supratentorial or middle cerebr\$ or MCA or anterior circulation or basilar artery or vertebral artery) adj5 (isch?emi\$ or infarct\$ or thrombo\$ or emboli\$ or occlus\$ or hypoxi\$)).tw.                                                                                                                        |
| 4   | 1 or 2 or 3                                                                                                                                                                                                                                                                                                                                                                                                                                  |
| 5   | carotid artery, internal/                                                                                                                                                                                                                                                                                                                                                                                                                    |
| 6   | carotid artery thrombosis/ or carotid stenosis/ or arterial occlusive diseases/ or exp arteriosclerosis/ or constriction, pathologic/                                                                                                                                                                                                                                                                                                        |
| 7   | 5 and 6                                                                                                                                                                                                                                                                                                                                                                                                                                      |
| 8   | ((internal carotid or ICA or tandem) adj5 (stenos?s or occlus\$ or occlud\$ or thrombo\$ or narrow\$ or plaque\$ or constrict\$ or emboli\$ or block\$ or arteriosclero\$ or atherosclero\$ or atheroma\$ or isch?emi\$ or infarct\$ or insufficien\$ or obstruct\$)).tw.                                                                                                                                                                    |
| 9   | 7 or 8                                                                                                                                                                                                                                                                                                                                                                                                                                       |
| 10  | endovascular procedures/ or catheterization/ or angioplasty/ or exp angioplasty, balloon/                                                                                                                                                                                                                                                                                                                                                    |
| 11  | vascular surgical procedures/ or exp thrombectomy/ or exp embolectomy/                                                                                                                                                                                                                                                                                                                                                                       |
| 12  | exp stents/                                                                                                                                                                                                                                                                                                                                                                                                                                  |
| 13  | (angioplast\$ or stent\$ or pta or revasculari?ation or recanali?ation or catheter\$ or dilatation or thromboaspirat\$ or thrombo-aspirat\$ or thrombecto\$ or embolecto\$).tw.                                                                                                                                                                                                                                                              |
| 14  | ((clot or thrombus or thrombi or embol\$) adj5 (aspirat\$ or remov\$ or retriev\$ or fragmentation or retract\$ or extract\$ or obliterated\$ or dispers\$)).tw.                                                                                                                                                                                                                                                                             |
| 15  | ((mechanical or pharmacomechanical or endovascular or neurovascular) adj5 (thrombolys\$ or reperfusion or fragmentation or aspirat\$)).tw.                                                                                                                                                                                                                                                                                                   |
| 16  | thrombolytic therapy/ or fibrinolytic agents/ or tissue plasminogen activator/ or exp plasminogen activators/ or fibrinolysis/                                                                                                                                                                                                                                                                                                               |

|    |                                                                                                                                                                                                                                                                |
|----|----------------------------------------------------------------------------------------------------------------------------------------------------------------------------------------------------------------------------------------------------------------|
| 17 | (thromboly\$ or fibrinoly\$ or recanalization).tw.                                                                                                                                                                                                             |
| 18 | ((clot or thrombus or thrombi or embol\$) adj5 (lyse or lysis or dissolve\$ or dissolution)).tw.                                                                                                                                                               |
| 19 | (tPA or t-PA or rtPA or rt-PA or plasminogen or plasmin or alteplase or actilyse).tw.                                                                                                                                                                          |
| 20 | (anistreplase or streptodornase or streptokinase or urokinase or pro?urokinase or rpro?uk or lumbrokinase or duteplase or lanoteplase or pamiteplase or reteplase or saruplase or staphylokinase or streptase or tenecteplase or desmoteplase or retevase).tw. |
| 21 | 16 or 17 or 18 or 19 or 20                                                                                                                                                                                                                                     |
| 22 | infusions, intra-arterial/                                                                                                                                                                                                                                     |
| 23 | (intra arterial or intra-arterial or intraarterial or IA).tw.                                                                                                                                                                                                  |
| 24 | 22 or 23                                                                                                                                                                                                                                                       |
| 25 | 21 and 24                                                                                                                                                                                                                                                      |
| 26 | 10 or 11 or 12 or 13 or 14 or 15 or 25                                                                                                                                                                                                                         |
| 27 | 4 and 9 and 26                                                                                                                                                                                                                                                 |
